# Supplementary material for: Fluorene-terminated hole transporting materials with a spiro[fluorene-9,9′-xanthene] core for perovskite solar cells
Source: Royal Society of Chemistry journal article supplement (doi:10.1039/d0nj06262f), 2021-01-01
Supplement: d0nj06262f1.pdf [file d0nj06262f1.pdf]

## Supporting Information

### Fluorene-terminated Hole Transporting Material with Spiro[fluorene-9,9'-xanthene] Core for Perovskite Solar Cells

Yan Chen, Yanqing Wang\*, Di Wu, Wenfei Wu, Yu Wu, Sicheng Li, Chunlan Qin, Hongyu Lin,  
Huachen Shen, Chengwu Shi

School of Chemistry and Chemical Engineering, Hefei University of Technology, Hefei 230009, P.  
R. China

#### Synthetic details

All the chemical reagents were used as received and employed directly without any further purification. The synthesis and characterization of compounds 2Br-F, 4Br-FM, 4Br-FP and FPA were followed those methods detailed in previous reports (Chiykowski et al., 2018; Jeon et al., 2018).

#### Measurements

The NMR spectroscopy test uses  $\text{CDCl}_3$  or  $\text{DMSO-}d_6$  as a solvent to obtain the  $^1\text{H}$  and  $^{13}\text{C}$  NMR spectra on a Bruker DPX. High-resolution mass spectrometry (HR-MS) was recorded with MS Bruker Daltonik Reflex III. UV-vis spectra of **SFX-F**, **SFX-FM** and **SFX-FP** in dichloromethane ( $\text{CH}_2\text{Cl}_2$ ) were carried out by a CARY 5000 UV-vis near infrared spectrophotometer (Agilent, USA). Cyclic voltammetry (CV) curves were measured at a CHI 660D electrochemical workstation (Shanghai Chenhua Device Company, China). Differential scanning calorimetry (DSC) was used to collect  $T_g$  under nitrogen, the material was heated from 30 °C to 200 °C at a rate of 10 °C  $\text{min}^{-1}$ . The thermal decomposition ( $T_d$ ) was tested by TGA8000 and scan to 700°C at 10°C  $\text{min}^{-1}$ . Atom force microscope (AFM) and the top view of scanning electron microscope (SEM) were used to obtained the surface morphology of hole transport layer and perovskite layer. The current density-voltage ( $J$ - $V$ ) curve in this study was measured by a 3A grade solar simulator (Newport, USA, 94043A) under AM1.5G illumination. The incident photon-to-electron conversion efficiency (IPCE) spectra was tested by the IPCE Measurement Tool kit (Newport, USA).

## References

1. V. A. Chiykowski, Y. Cao, H. Tan, D. P. Tabor, E. H. Sargent, A. Aspuru-Guzik and C. P. Berlinguette, *Angew. Chemie - Int. Ed.*, 2018, **57**, 15529-15533.
2. N. J. Jeon, H. Na, E. H. Jung, T. Y. Yang, Y. G. Lee, G. Kim, H. W. Shin, S. Il Seok, J. Lee and J. Seo, *Nat. Energy*, 2018, **3**, 682-689.

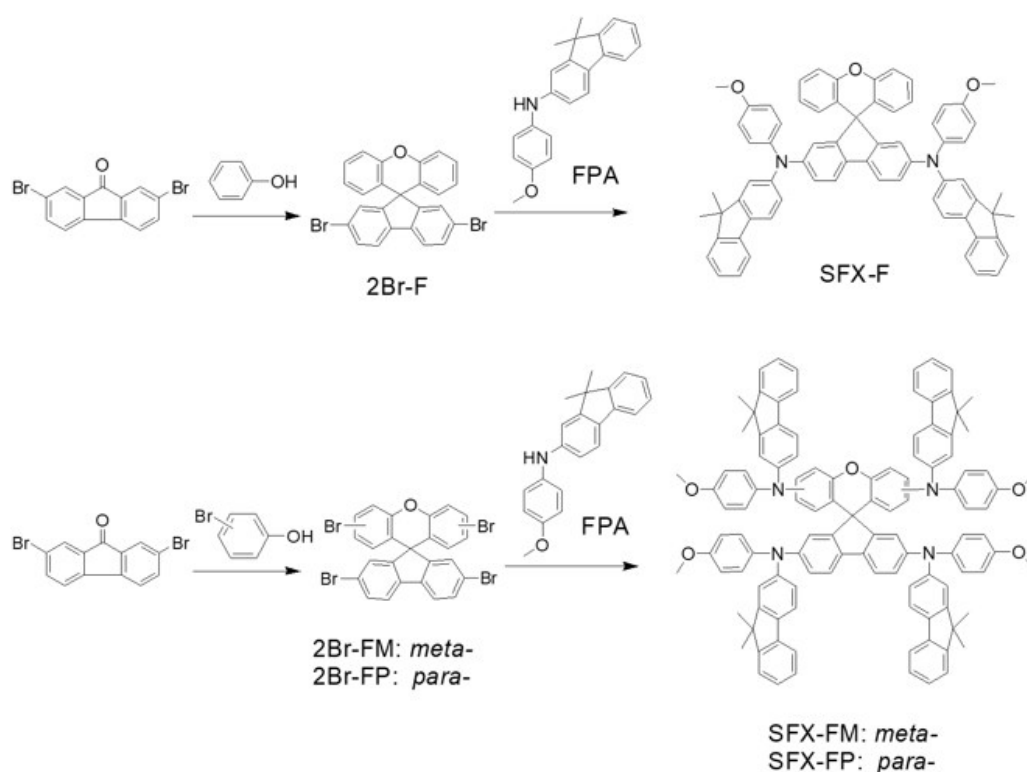

**Scheme S1.** The synthetic routes of **SFX-F**, **SFX-FM** and **SFX-FP**

**Synthesis of 2,7-dibromospiro[fluorene-9,9'-xanthene] (2Br-F):** a mixture of 0.94 g phenol (10 mmol), 0.34 g 2,7-dibromo-9-fluorenone (1 mmol) was heated to melt in a nitrogen atmosphere, followed by a drop of 0.26 mL methylsulfonic acid ( $\text{MeSO}_3\text{H}$ ,  $d = 1.48 \text{ g mL}^{-1}$ , 385 mg, 4 mmol) and continued to react at 150 °C for 8 h. Cool the reaction solution to room temperature, then slowly add 80 mL methanol, with white solid precipitates. The filtered white solid was washed with a large amount of methanol to obtain 327 mg of white powder, yield 67%.  $^1\text{H NMR}$  (600 MHz,  $\text{DMSO-d}_6$ )  $\delta$ ppm= 8.00 (d,  $J = 8.2 \text{ Hz}$ , 2H), 7.63 (dd,  $J = 8.2, 1.7 \text{ Hz}$ , 20H), 7.31 – 7.28 (m, 4H), 7.21 (d,  $J = 1.7 \text{ Hz}$ , 2H), 6.88 (ddd,  $J = 8.1, 6.0, 2.4 \text{ Hz}$ , 2H), 6.29 (d,  $J = 7.3 \text{ Hz}$ , 2H).

**Synthesis of 2,2',7,7'-tetrabromospiro[fluorene-9,9'-xanthene] (4Br-FM):** Compound was prepared following a modified literature procedure for 4Br-F.  $^1\text{H NMR}$  (600 MHz,  $\text{CDCl}_3$ )  $\delta$ ppm= 7.62 (d,  $J = 8.2 \text{ Hz}$ , 2H), 7.52 (dd,  $J = 8.2, 1.7 \text{ Hz}$ , 2H), 7.41 (d,  $J = 2.0 \text{ Hz}$ , 2H), 7.21 (d,  $J = 1.7 \text{ Hz}$ , 2H), 6.96 (dd,  $J = 8.4, 2.0 \text{ Hz}$ , 2H), 6.23 (d,  $J = 8.4 \text{ Hz}$ , 2H).

**Synthesis of 2,3',6',7'-tetrabromospiro[fluorene-9,9'-xanthene] (4Br-FP):** Compound was prepared following a modified literature procedure for 4Br-F.  $^1\text{H NMR}$  (600 MHz,  $\text{CDCl}_3$ )  $\delta$ ppm= 7.65 (d,  $J = 8.2 \text{ Hz}$ , 2H), 7.55 (dd,  $J = 8.1, 1.7 \text{ Hz}$ , 2H), 7.34 (dd,  $J = 8.8, 2.4 \text{ Hz}$ , 2H), 7.21 (d,  $J =$

1.6 Hz, 2H), 7.12 (d, J = 8.7 Hz, 2H), 6.42 (d, J = 2.3 Hz, 2H).

**N2,N7-dis(9,9-dimethyl-9H-fluoren-2-yl)-N2,N7-dis(4-methoxyphenyl)-Spiro[fluorene-9,9-xanthene]-2,7-diamine (SFX-F):** 140 mg N-(p-methoxyphenyl)-N'-(9,9'-dimethylfluoren-2-yl)amino (0.44 mmol), 98 mg 2Br-F (0.2 mmol), 15 mg of Pd<sub>2</sub>(dba)<sub>3</sub> (0.016 mmol), 5 mg tributylphosphine tetrafluoroborate (0.016 mmol) and 113 mg t-BuOK (1 mmol) were dissolved in 10 mL of dried toluene and heated to 110 °C in a nitrogen atmosphere. Then the reaction mixture was stirred at reflux for 24 h under 110 °C. The reaction solution was cooled to room temperature and then poured into water for 10 min. The organic phase was extracted with DCM and dried with anhydrous MgSO<sub>4</sub> to obtain the crude product after removing the solvent. The crude product was isolated and purified with a column of chromatography (v:v, petroleum ether : ethyl acetate = 15 : 1) to obtain 100 mg of brown solid with a yield of 53 %. <sup>1</sup>H NMR (600 MHz, DMSO-d<sub>6</sub>) δppm = 7.71 (d, J = 8.3 Hz, 2H), 7.64 (d, J = 7.4 Hz, 2H), 7.55 (d, J = 8.2 Hz, 2H), 7.43 (d, J = 7.4 Hz, 2H), 7.27 (t, J = 7.4 Hz, 2H), 7.23 – 7.20 (m, 2H), 7.18 (d, J = 8.1 Hz, 2H), 7.03 (d, J = 8.2 Hz, 2H), 7.00 (d, J = 7.3 Hz, 4H), 6.98 (s, 2H), 6.96 (d, J = 7.7 Hz, 2H), 6.88 (d, J = 8.9 Hz, 4H), 6.84 (d, J = 8.4 Hz, 2H), 6.70 (d, J = 8.2 Hz, 2H), 6.67 (s, 2H), 6.54 (d, J = 7.9 Hz, 2H), 3.73 (s, 6H), 1.11 (s, 12H). <sup>13</sup>C NMR (151 MHz, DMSO-d<sub>6</sub>) δppm = 156.57, 156.08, 154.90, 153.39, 150.72, 147.62, 147.09, 140.05, 138.63, 133.36, 133.20, 128.87, 127.91, 127.76, 127.40, 126.88, 124.85, 124.14, 122.96, 122.21, 122.06, 121.33, 120.95, 119.80, 118.08, 117.01, 115.46, 55.65, 46.62, 27.17. HRMS (MALDI-TOF) *m/z*: [M+H]<sup>+</sup> calcd for C<sub>69</sub>H<sub>54</sub>N<sub>2</sub>O<sub>3</sub>, 959.4213; found, 959.4218.

**N2,N2',N7,N7'-tetrakis(9,9-dimethyl-9H-fluoren-2-yl)-N2,N2',N7,N7'-tetrakis(4-methoxyphenyl)-Spiro[fluorene-9,9-xanthene]-2,2',7,7'-tetraamine (SFX-FM):** Compound was prepared following a modified literature procedure for SFX-F. <sup>1</sup>H NMR (600 MHz, DMSO-d<sub>6</sub>) δppm = 7.66 (m, 8H), 7.59 (d, J = 8.9 Hz, 2H), 7.44 (s, 4H), 7.27 (s, 4H), 7.22 (t, J = 7.3 Hz, 4H), 7.11 (s, 4H), 7.04 (d, J = 8.7 Hz, 4H), 7.00 (d, J = 8.4 Hz, 4H), 6.94 (d, J = 8.2 Hz, 2H), 6.88 (d, J = 8.6 Hz, 8H), 6.80 (d, J = 8.4 Hz, 2H), 6.75 (d, J = 12.0 Hz, 4H), 6.48 (d, J = 8.9 Hz, 2H), 6.34 (d, J = 8.5 Hz, 2H), 6.23 (s, 2H), 3.73 (s, 6H), 3.70 (s, 6H), 1.27 (s, 12H), 1.22 (s, 12H). <sup>13</sup>C NMR (151 MHz, DMSO-d<sub>6</sub>) δppm = 156.85, 156.51, 155.68, 155.16, 154.93, 153.53, 151.53, 148.31, 146.56, 140.18, 139.54, 139.14, 138.57, 134.43, 133.32, 133.28, 128.25, 128.06, 127.63, 127.43, 127.11, 123.77, 123.01, 122.95, 121.96, 121.36, 121.29, 120.82, 120.55, 119.93, 119.75, 118.96,

118.18, 117.22, 115.80, 115.49, 115.36, 79.61, 55.63, 55.58, 46.77, 46.69, 27.31, 27.17. HRMS (MALDI-TOF)  $m/z$ :  $[M+H]^+$  calcd for  $C_{113}H_{92}N_4O_5$ , 1585.7146; found, 1585.7144.

***N2,N3',N6',N7-tetrakis(9,9-dimethyl-9H-fluorene-2-yl)-N2,N3',N6',N7-tetrakis(4-methoxyphenyl)-Spiro[fluorene-9,9-xanthene]-2,3',6',7-tetraamine (SFX-FP)***: Compound was prepared following a modified literature procedure for SFX-F.  $^1H$  NMR (600 MHz, DMSO- $d_6$ )  $\delta$ ppm = 7.69 (dd,  $J = 7.2, 3.5$  Hz, 4H), 7.62 (t,  $J = 8.4$  Hz, 4H), 7.51 (t,  $J = 7.5$  Hz, 4H), 7.44 (d,  $J = 8.3$  Hz, 2H), 7.37 – 7.23 (m, 8H), 7.11 (d,  $J = 1.8$  Hz, 2H), 7.06 (d,  $J = 8.8$  Hz, 2H), 7.01 (d,  $J = 3.3$  Hz, 4H), 6.98 (d,  $J = 3.4$  Hz, 4H), 6.96 (d,  $J = 1.8$  Hz, 2H), 6.94 (s, 2H), 6.92 (s, 4H), 6.89 (d,  $J = 1.9$  Hz, 4H), 6.83 (dd,  $J = 8.8, 2.6$  Hz, 2H), 6.80 – 6.77 (m, 2H), 6.76 (dd,  $J = 8.5, 1.4$  Hz, 4H), 6.39 (d,  $J = 2.6$  Hz, 2H), 3.79 (s, 6H), 3.77 (s, 6H), 1.30 (s, 12H), 1.27 (s, 12H).  $^{13}C$  NMR (151 MHz, DMSO- $d_6$ )  $\delta$ ppm = 156.48, 156.23, 154.88, 152.66, 154.65, 153.32, 153.24, 147.49, 147.40, 147.17, 146.82, 143.23, 140.17, 140.10, 138.77, 138.65, 133.25, 133.09, 132.54, 127.55, 127.37, 127.01, 126.89, 126.70, 125.91, 124.09, 122.99, 122.42, 121.74, 121.37, 121.13, 120.94, 120.36, 119.77, 119.67, 118.09, 116.76, 115.53, 115.33, 55.61, 55.59, 46.66, 46.60, 27.32. HRMS (MALDI-TOF)  $m/z$ :  $[M+H]^+$  calcd for  $C_{113}H_{92}N_4O_5$ , 1585.7146; found, 1585.7153.

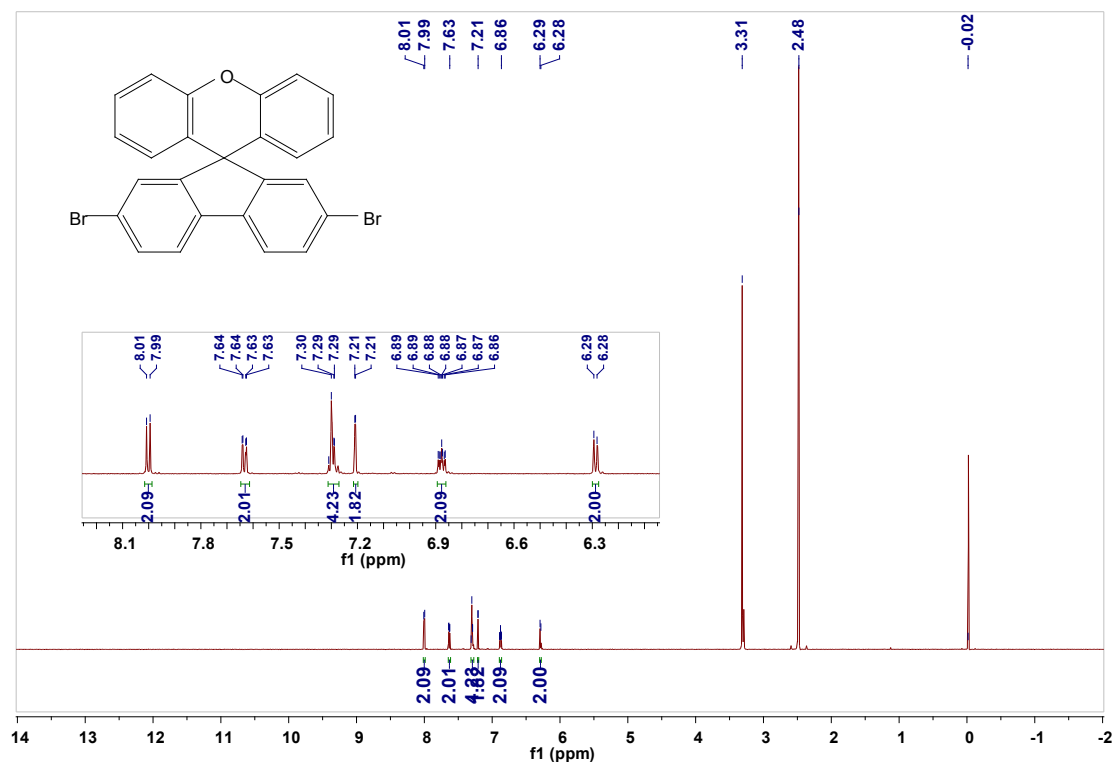

Fig. S1.  $^1H$  NMR spectrum of **2Br-F**

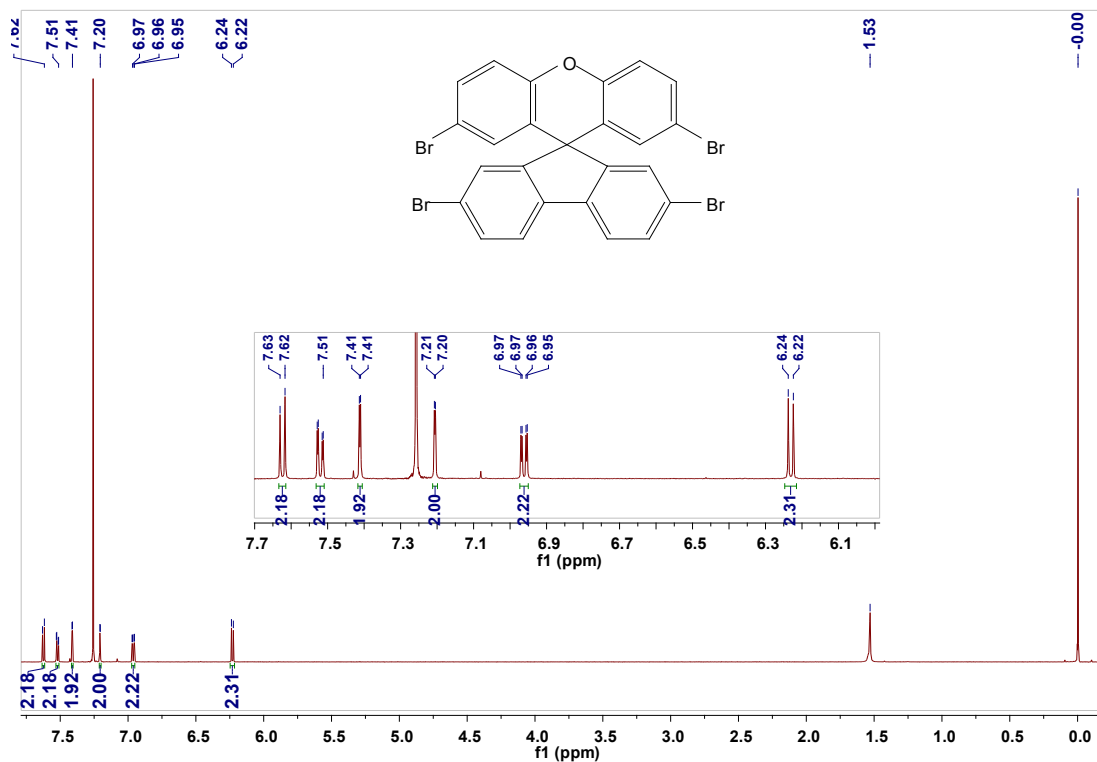

Fig. S2.  $^1\text{H}$  NMR spectrum of 2Br-FM

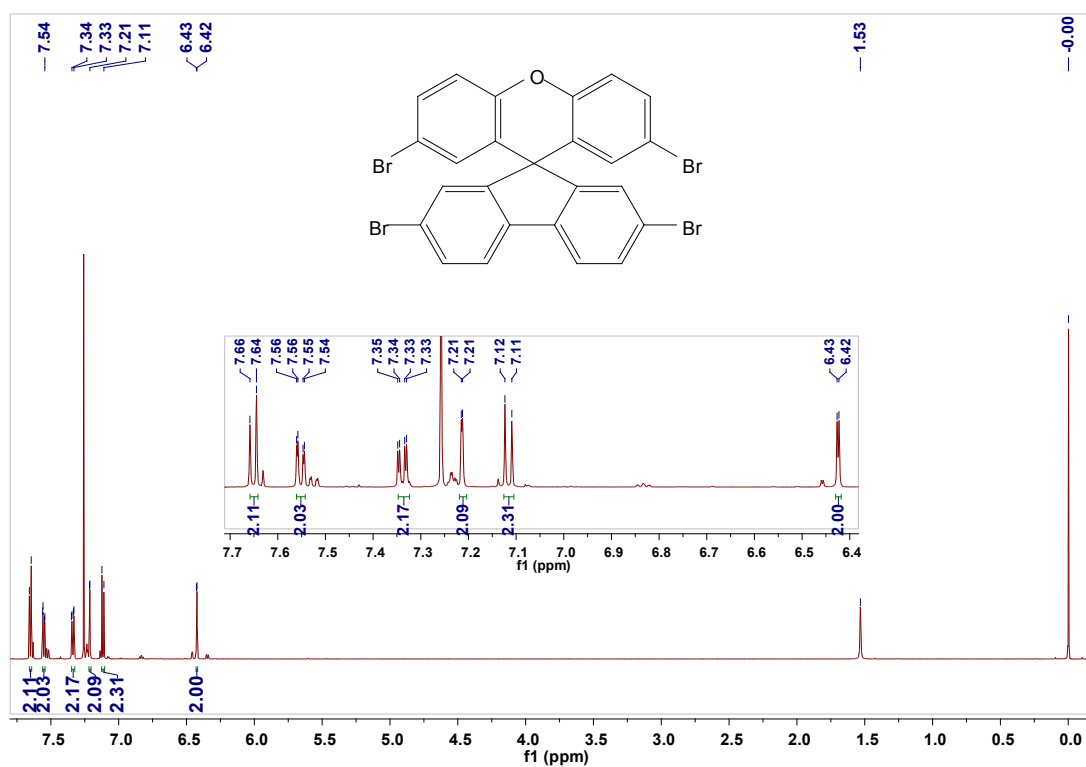

Fig. S3.  $^1\text{H}$  NMR spectrum of 2Br-FP

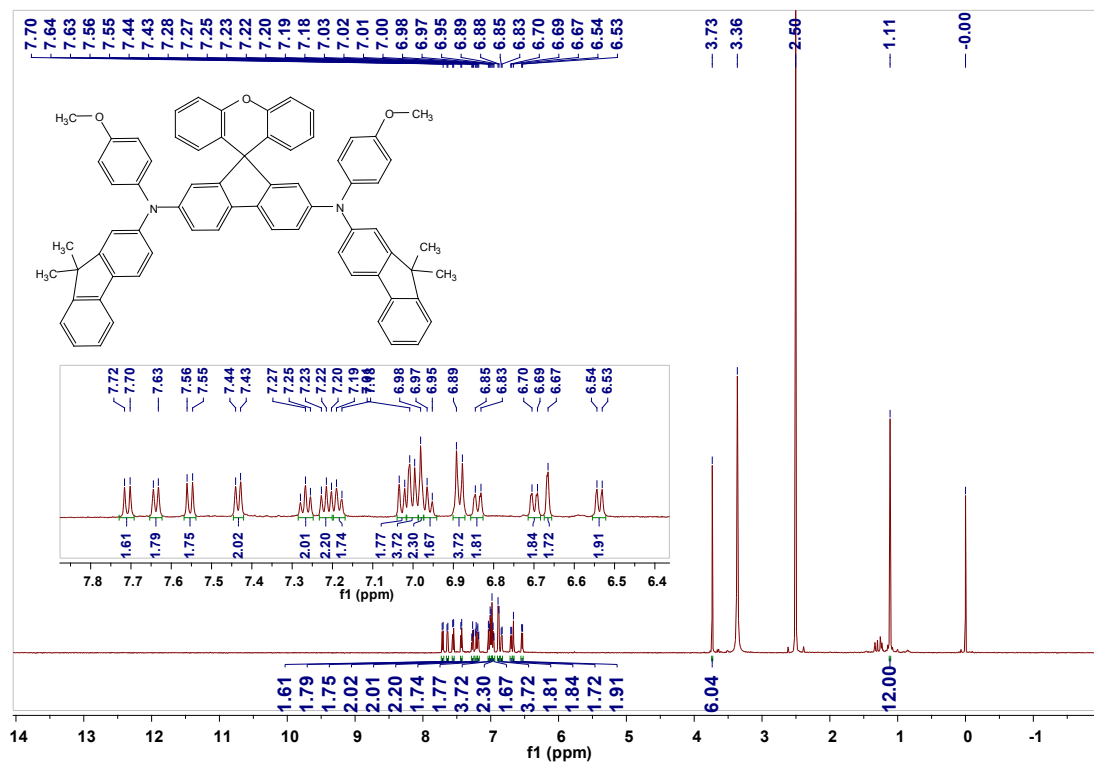

Fig. S4. <sup>1</sup>H NMR spectrum of SFX-F

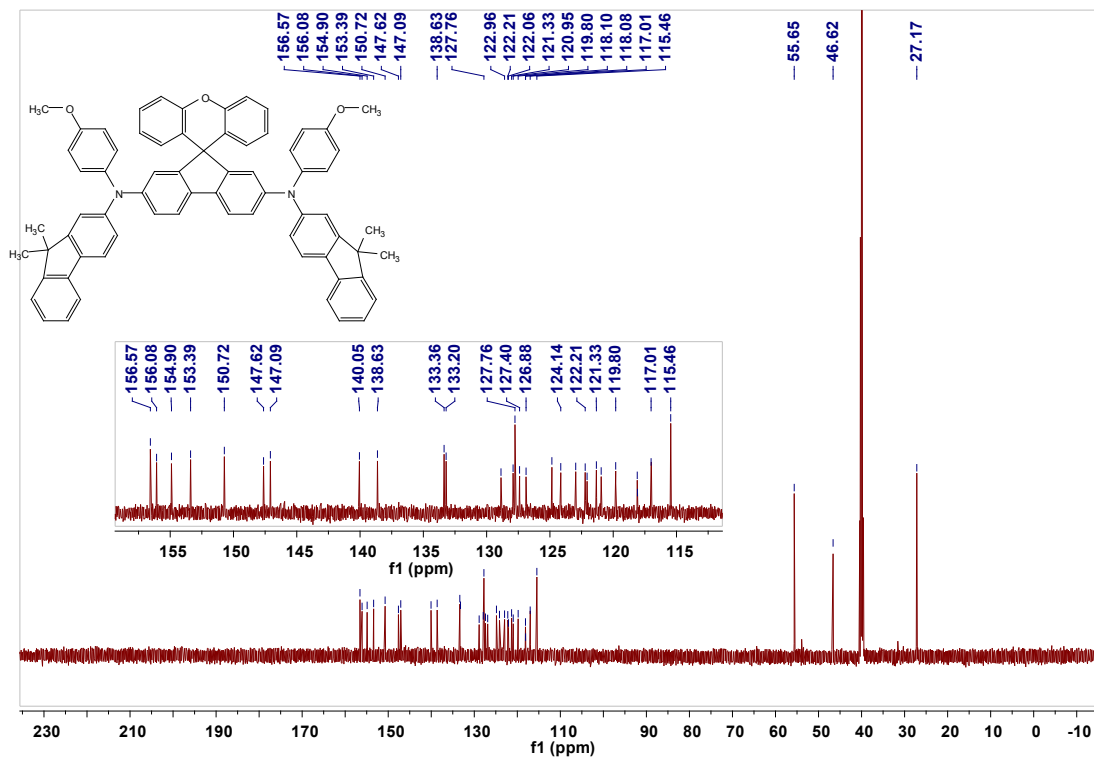

Fig. S5. <sup>13</sup>C NMR spectrum of SFX-F

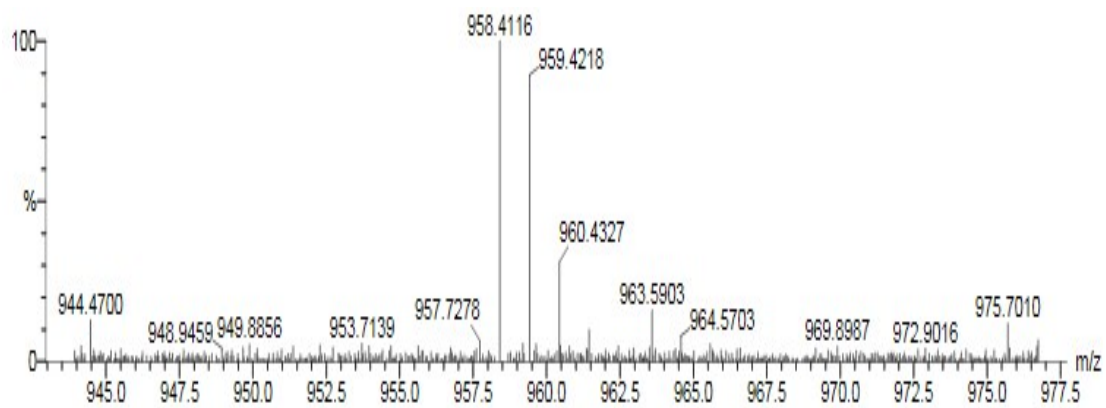

Fig. S6. MS spectrum of SFX-F

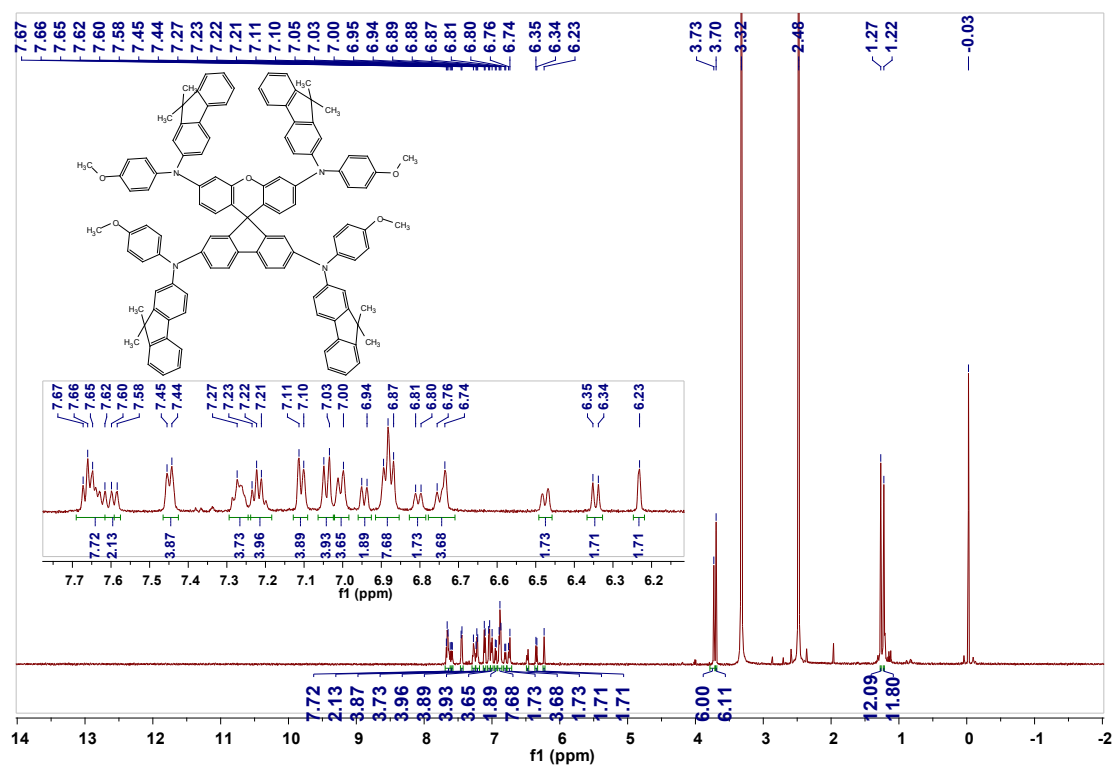

Fig. S7. <sup>1</sup>H NMR spectrum of SFX-FM



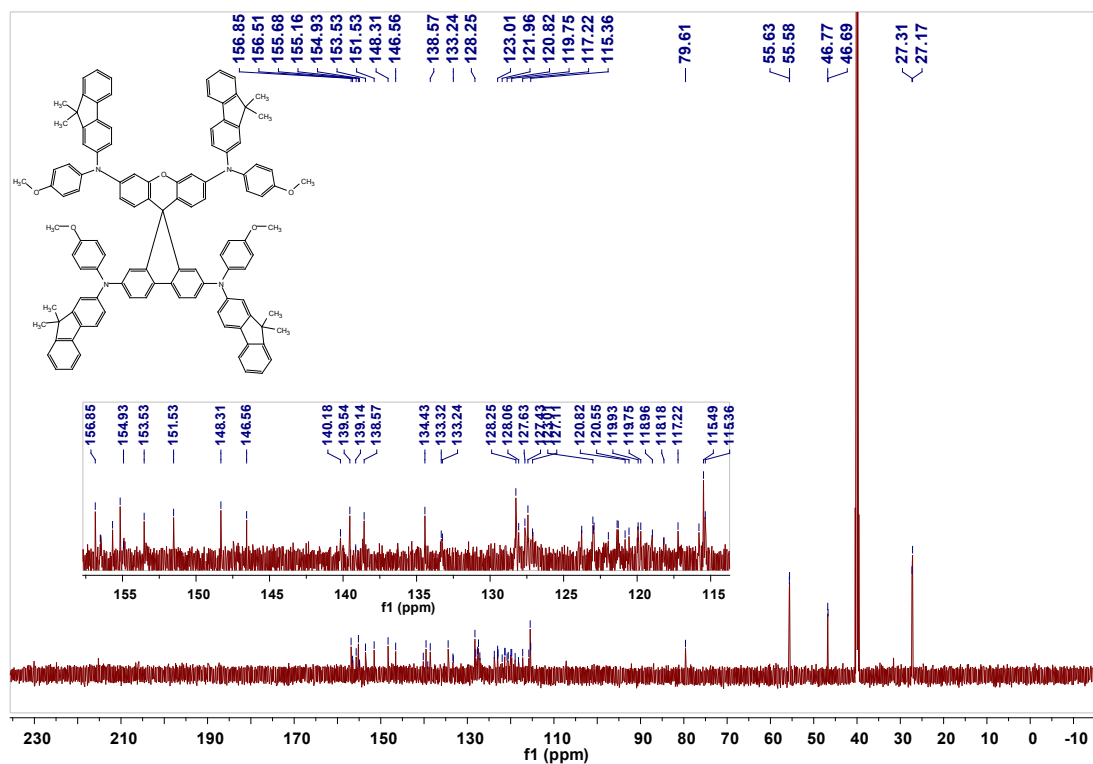

Fig. S8.  $^{13}\text{C}$  NMR spectrum of SFX-FM

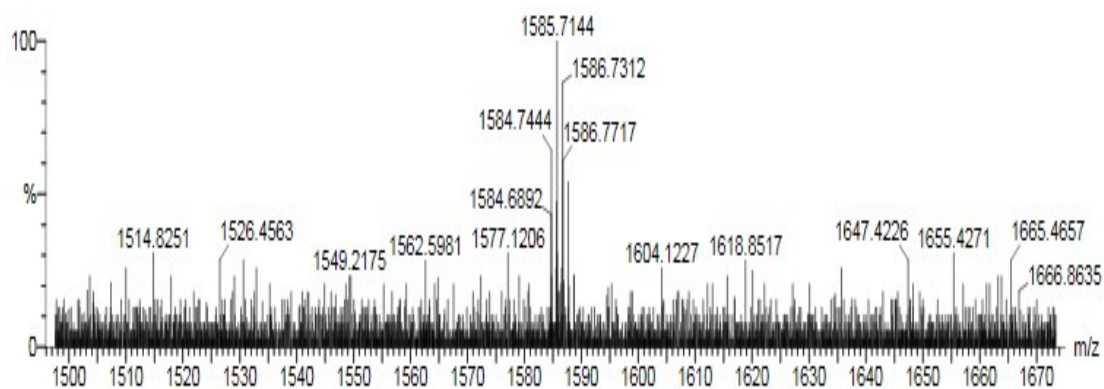

Fig. S9. MS spectrum of SFX-FM

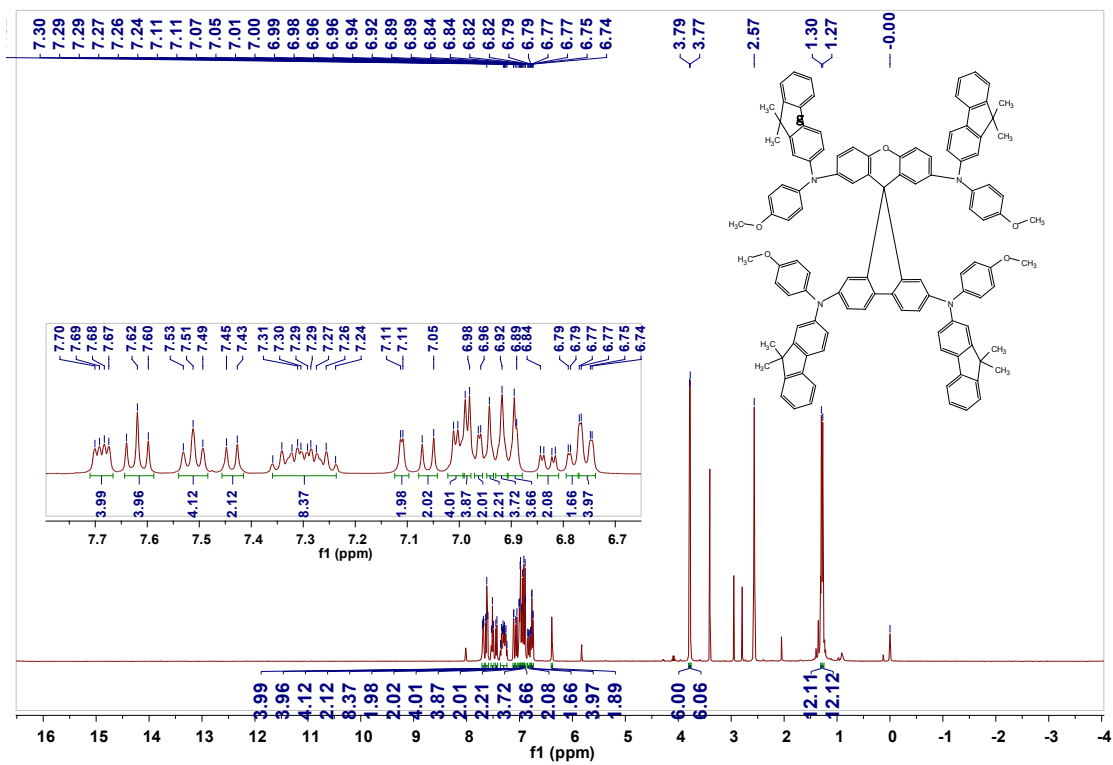

Fig. S10. <sup>1</sup>H NMR spectrum of SFX-FP

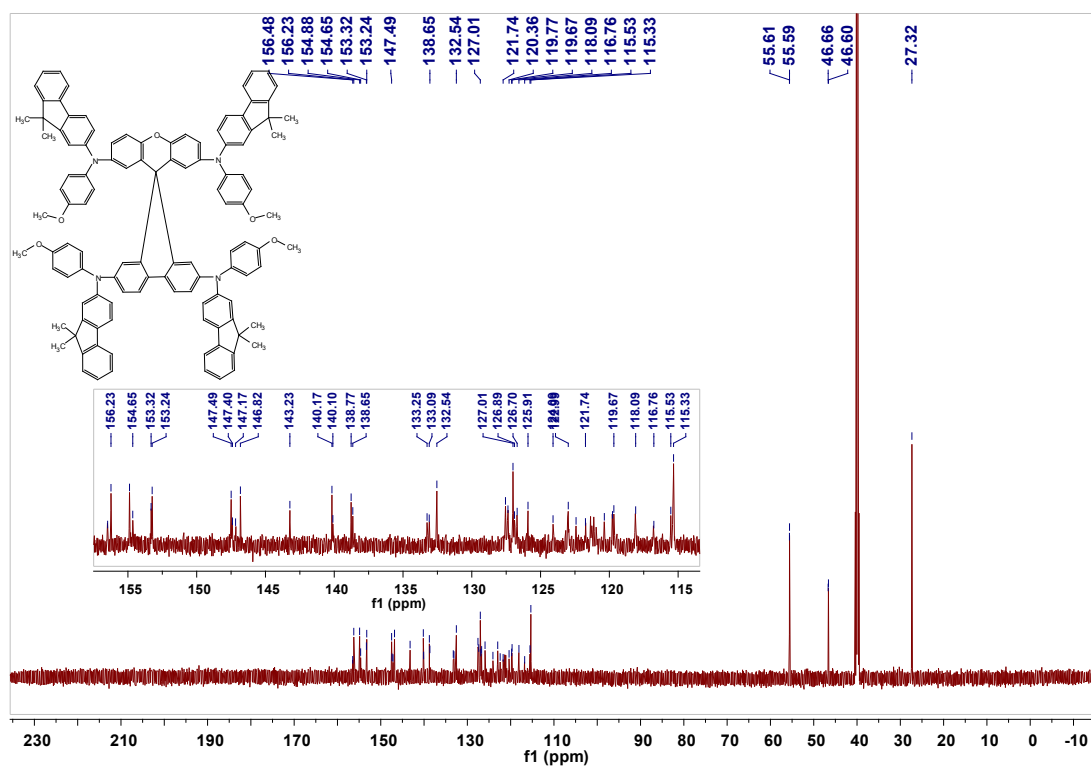

Fig. S11. <sup>13</sup>C NMR spectrum of SFX-FP

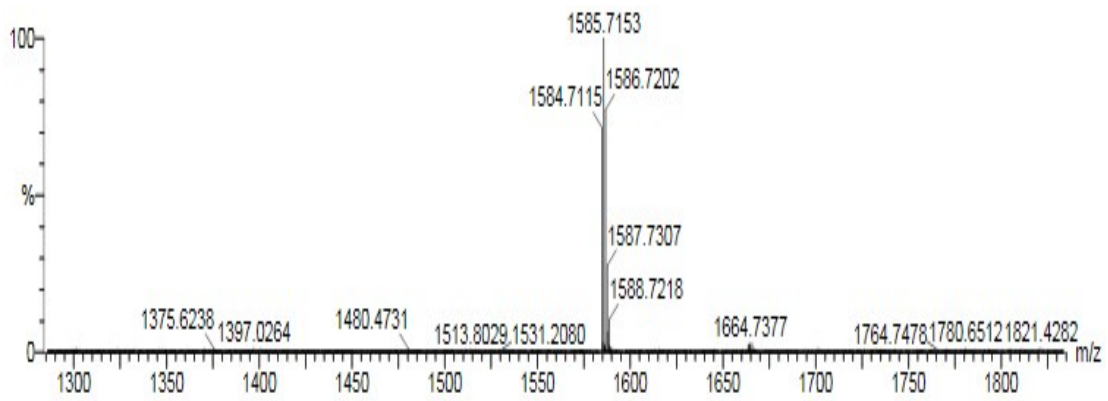

**Fig. S12.** MS spectrum of SFX-FP

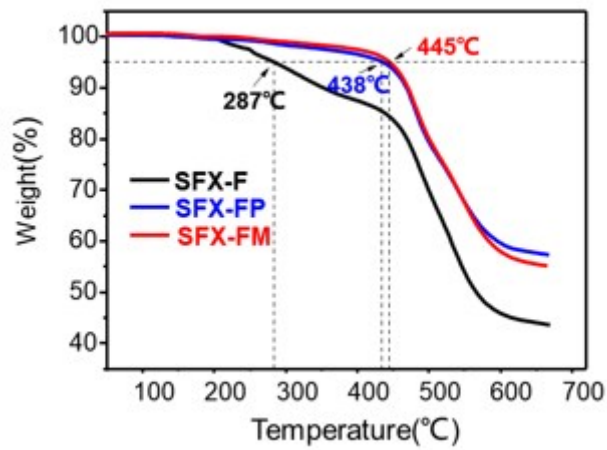

**Fig. S13.** TGA thermograms of SFX-F, SFX-FM and SFX-FP at a scan rate of 10 °C/min.

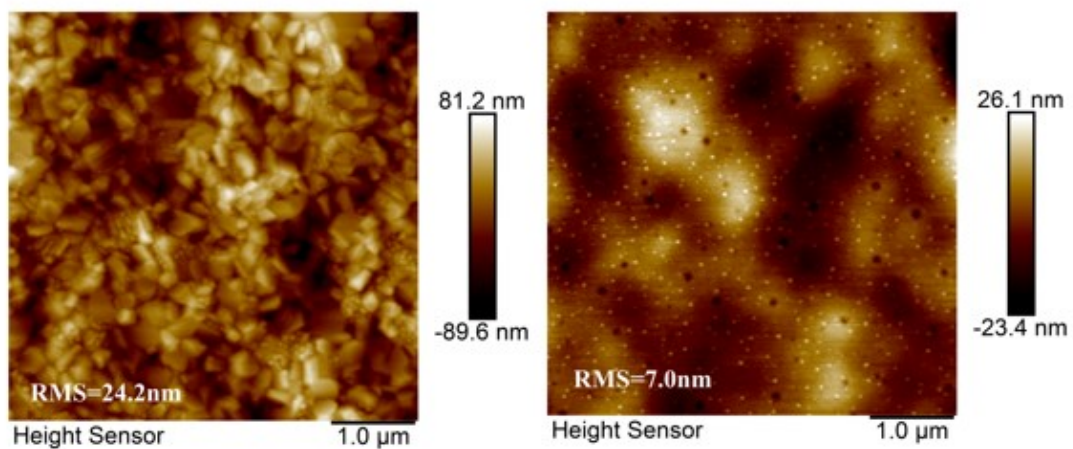

**Fig. S14.** AFM images of FTO/TiO<sub>2</sub>/perovskite and FTO/TiO<sub>2</sub>/perovskite/spiro-OMeTAD.

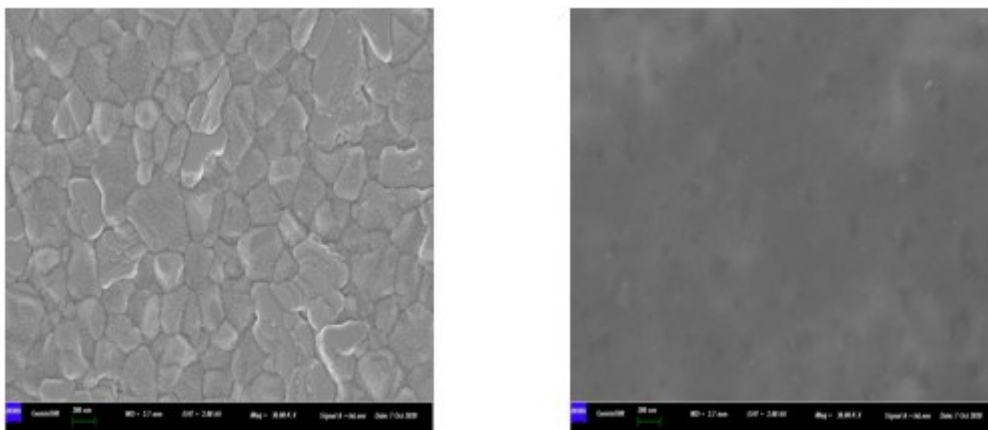

**Fig. S15.** SEM images of FTO/TiO<sub>2</sub>/perovskite and FTO/TiO<sub>2</sub>/perovskite/*spiro*-OMeTAD.

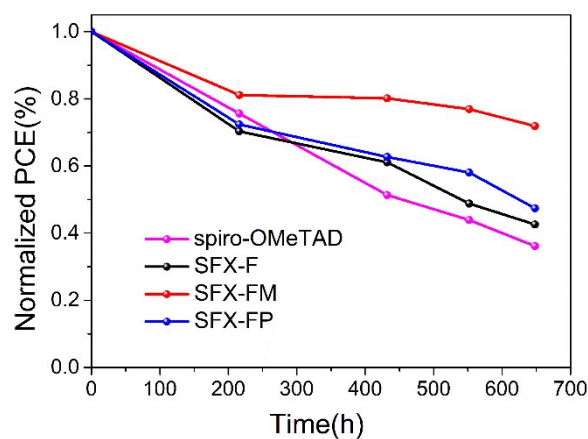

**Fig. S16.** Efficiency evolution of the PSC devices in a humidity (30 RH) environment at 25 °C for 648 h, under AM 1.5 illumination of 100 mW cm<sup>-2</sup>.

**Table S1** Materials quantities and cost evaluation for the synthesis of **SFX-F**

| Chemical                      | Weight Reagent g/g | Weight Solvent g/g | Weight Workup g/g | Price of Chemical \$/kg | Chemical Cost \$ | Target product \$/g     |
|-------------------------------|--------------------|--------------------|-------------------|-------------------------|------------------|-------------------------|
| 2,7-Dibromo-9-fluorenone      | 0.34               |                    |                   | 3851                    | 1.31             | <b>Product</b><br>20.91 |
| MeSO <sub>3</sub> H           |                    | 0.385              |                   | 120.5                   | 0.05             |                         |
| Phenol                        | 0.94               |                    |                   | 18.23                   | 0.02             |                         |
| Methanol                      |                    |                    | 100               | 2.21                    | 0.22             |                         |
| 2-Bromo-9,9'-dimethylfluorene | 0.68               |                    |                   | 2053                    | 1.4              |                         |
| 4-Methoxyaniline              | 0.37               |                    |                   | 123.77                  | 0.05             |                         |
| Toluene                       |                    | 50                 |                   | 6.25                    | 0.18             |                         |

|                                             |        |      |        |      |
|---------------------------------------------|--------|------|--------|------|
| Ethyl acetate                               |        | 1100 | 3.47   | 2.42 |
| Petroleum ether                             |        | 1500 | 3      | 4.41 |
| Silicone powder                             |        | 400  | 4.93   | 2.45 |
| Tri-tert-butylphosphine                     | 0.05   |      | 34118  | 1.7  |
| Tri-tert-butylphosphonium tetrafluoroborate | 0.005  |      | 82671  | 0.4  |
| Sodium tert-butoxide                        | 0.48 g |      | 383.84 | 0.18 |
| Potassium tert-butoxide                     | 0.113  |      | 704.64 | 0.08 |
| Pd <sub>2</sub> (dba) <sub>3</sub>          | 0.09   |      | 55351  | 4.98 |
| CH <sub>2</sub> Cl <sub>2</sub>             |        | 600  | 2.31   | 1.36 |

**Table S2** Materials quantities and cost evaluation for the synthesis of **SFX-FM**

| Chemical                                    | Weight Reagent g/g | Weight Solvent g/g | Weight Workup g/g | Price of Chemical \$/kg | Chemical Cost \$ | Target product \$/g |
|---------------------------------------------|--------------------|--------------------|-------------------|-------------------------|------------------|---------------------|
| 2,7-Dibromo-9-fluorenone                    | 0.34               |                    |                   | 3851                    | 1.31             |                     |
| MeSO <sub>3</sub> H                         |                    | 0.385              |                   | 120.5                   | 0.05             |                     |
| 3-Bromophenol                               | 1.73               |                    |                   | 642.83                  | 1.12             |                     |
| 2-Bromo-9,9'-dimethylfluorene               | 0.68               |                    |                   | 2053                    | 1.4              |                     |
| 4-Methoxyaniline                            | 0.37               |                    |                   | 123.77                  | 0.05             |                     |
| Toluene                                     |                    | 50                 |                   | 6.25                    | 0.18             |                     |
| Ethyl acetate                               |                    |                    | 1100              | 3.47                    | 2.42             |                     |
| Petroleum ether                             |                    |                    | 1500              | 3                       | 4.41             |                     |
| Silicone powder                             |                    |                    | 400               | 4.93                    | 2.45             | <b>Product</b>      |
| Tri-tert-butylphosphine                     | 0.05               |                    |                   | 34118                   | 1.7              | 23.97               |
| Tri-tert-butylphosphonium tetrafluoroborate | 0.007              |                    |                   | 82671                   | 0.58             |                     |
| Sodium tert-butoxide                        | 0.48 g             |                    |                   | 383.84                  | 0.18             |                     |
| Potassium tert-butoxide                     | 0.17               |                    |                   | 704.64                  | 0.12             |                     |
| Pd <sub>2</sub> (dba) <sub>3</sub>          | 0.12               |                    |                   | 55351                   | 6.64             |                     |
| CH <sub>2</sub> Cl <sub>2</sub>             |                    |                    | 600               | 2.31                    | 1.36             |                     |

**Table S3** Materials quantities and cost evaluation for the synthesis of **SFX-FP**

| <b>Chemical</b>                                    | <b>Weight<br/>Reagent<br/>g/g</b> | <b>Weight<br/>Solvent<br/>g/g</b> | <b>Weight<br/>Workup<br/>g/g</b> | <b>Price of<br/>Chemical<br/>\$/kg</b> | <b>Chemical<br/>Cost<br/>\$</b> | <b>Target<br/>product<br/>\$/g</b> |
|----------------------------------------------------|-----------------------------------|-----------------------------------|----------------------------------|----------------------------------------|---------------------------------|------------------------------------|
| 2,7-Dibromo-9-<br>fluorenone                       | 0.34                              |                                   |                                  | 3851                                   | 1.31                            |                                    |
| MeSO <sub>3</sub> H                                |                                   | 0.385                             |                                  | 120.5                                  | 0.05                            |                                    |
| 4-Bromophenol                                      | 1.73                              |                                   |                                  | 385                                    | 0.67                            |                                    |
| 2-Bromo-9,9'-<br>dimethylfluorene                  | 0.68                              |                                   |                                  | 2053                                   | 1.4                             |                                    |
| 4-Methoxyaniline                                   | 0.37                              |                                   |                                  | 123.77                                 | 0.05                            |                                    |
| Toluene                                            |                                   | 50                                |                                  | 6.25                                   | 0.18                            |                                    |
| Ethyl acetate                                      |                                   |                                   | 1100                             | 3.47                                   | 2.42                            |                                    |
| Petroleum ether                                    |                                   |                                   | 1500                             | 3                                      | 4.41                            |                                    |
| Silicone powder                                    |                                   |                                   | 400                              | 4.93                                   | 2.45                            | <b>Product</b><br>23.52            |
| Tri-tert-<br>butylphosphine                        | 0.05                              |                                   |                                  | 34118                                  | 1.7                             |                                    |
| Tri-tert-<br>butylphosphonium<br>tetrafluoroborate | 0.007                             |                                   |                                  | 82671                                  | 0.58                            |                                    |
| Sodium tert-<br>butoxide                           | 0.48 g                            |                                   |                                  | 383.84                                 | 0.18                            |                                    |
| Potassium tert-<br>butoxide                        | 0.17                              |                                   |                                  | 704.64                                 | 0.12                            |                                    |
| Pd <sub>2</sub> (dba) <sub>3</sub>                 | 0.12                              |                                   |                                  | 55351                                  | 6.64                            |                                    |
| CH <sub>2</sub> Cl <sub>2</sub>                    |                                   |                                   | 600                              | 2.31                                   | 1.36                            |                                    |
